# Supplementary material
Source: PubMed Central journal article supplement (PMC2946231)
Supplement: NIHMS235138-supplement-Supplementary_Data.pdf [file NIHMS235138-supplement-Supplementary_Data.pdf]

## SUPPLEMENTARY INFORMATION

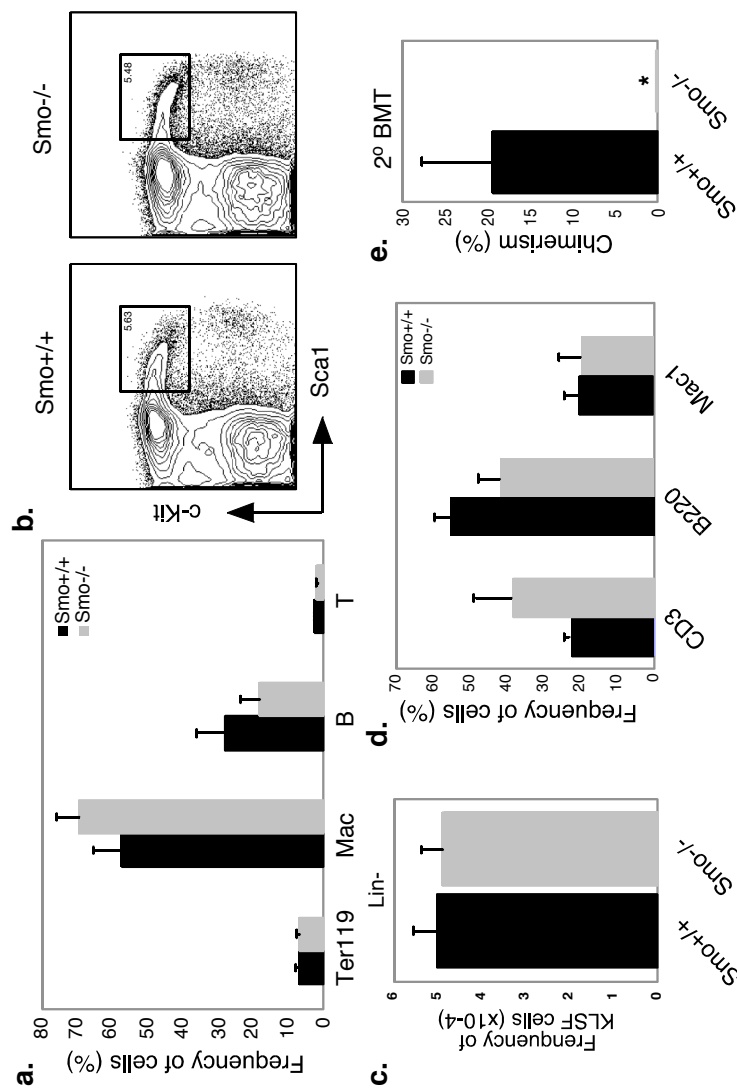**Supplementary Figure 1: Deletion of Smo does not alter the frequency of hematopoietic lineages**

(a) Bone marrow cells from control or Smo<sup>-/-</sup> mice were analyzed for frequency of cells of distinct hematopoietic lineages. Whole bone marrow cells were stained with erythroid (Ter119), myeloid (Mac1), B (B220) or T (CD4 and/or CD8) markers and analyzed by FACS. Data shown is an average of results from five mice. (b) Bone marrow cells from control or Smo<sup>-/-</sup> mice were analyzed for frequency of KLSF cells. Dot plots are shown for one representative control Smo<sup>+/+</sup> (left) and Smo<sup>-/-</sup> (right). (c) Average frequency of KLSF cells in control (n=10) and Smo<sup>-/-</sup> mice (n=10). Error bars show s.e.m. (d) Contribution to differentiated lineages from control Smo<sup>+/+</sup> and Smo<sup>-/-</sup> cells following long-term bone marrow transplantation in peripheral blood. Results are representative of two independent experiments, with 4-6 mice per cohort per experiment. (e) Secondary competitive repopulation analysis of control (Smo<sup>+/+</sup>) and Smo<sup>-/-</sup> mice was carried out using 1X10<sup>6</sup> bone marrow cells from primary recipients isolated at 24 weeks and analyzed for donor chimerism in secondary recipients at 24 weeks. Graph of average donor derived chimerism after long-term reconstitution (6 mice in each cohort p=0.04).

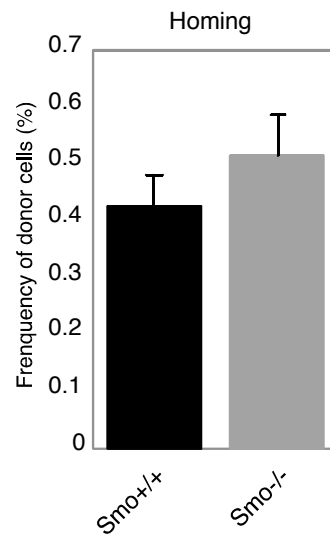

**Supplementary Figure 2: Homing of hematopoietic cells is not altered in absence of Smo**  
 $2 \times 10^6$  whole bone marrow cells from Smo<sup>+/+</sup> or Smo<sup>-/-</sup> mice were transplanted into lethally irradiated recipients. The graph shows average of donor chimerism after 6 hours (n=4 for control, n=5 for Smo<sup>-/-</sup> mice, p=0.4).

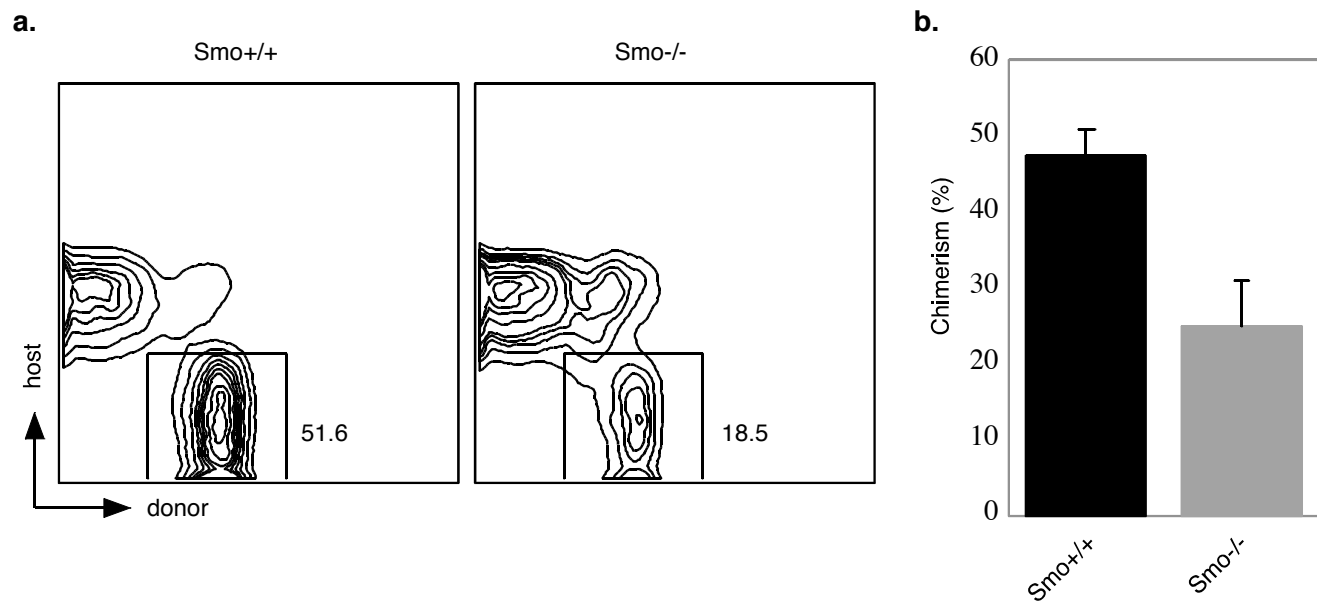

**Supplementary Figure 3: Comparative reconstitution of whole bone marrow from Smo<sup>+/+</sup> and Smo<sup>-/-</sup> mice** (a) 200,000 bone marrow cells from Smo<sup>+/+</sup> or Smo<sup>-/-</sup> mice were transplanted together with 200,000 competing bone marrow cells into lethally irradiated recipients. Plots show representative donor derived chimerism at 7 weeks. (b) Graph of average donor chimerism at 7 weeks (data is an average of 7 mice in each cohort,  $p=0.008$ ).

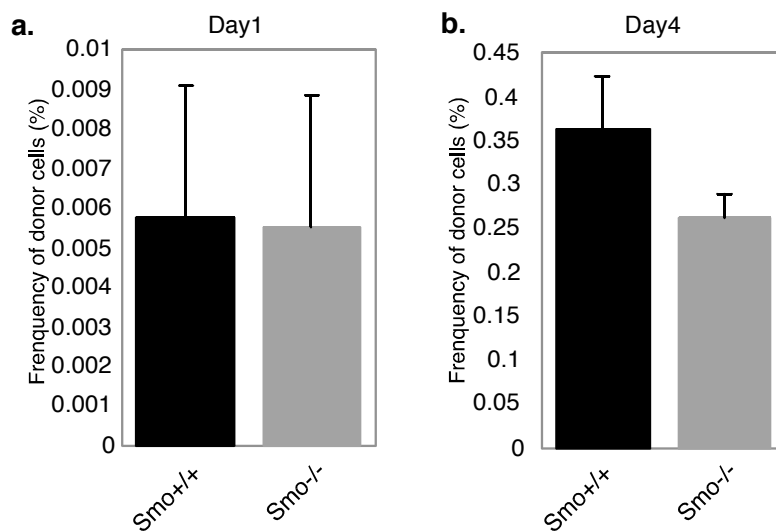

**Supplementary Figure 4: Homing of BCR-ABL transduced *Smo*<sup>+/+</sup> and *Smo*<sup>-/-</sup> cells are equivalent** (a-b) 30,000 KLSF cells from *Smo*<sup>+/+</sup> or *Smo*<sup>-/-</sup> mice infected with BCR-ABL were transplanted together with 200,000 competing bone marrow cells into lethally irradiated recipients. Recipient mice were sacrificed (a) 1 day or (b) 4 days after transplantation and analyzed for donor chimerism. Graphs show the average percentage of donor derived cells after 1 day (4 mice in each cohort for a total of 8 mice,  $p=0.96$ ) and 4 days (4 mice in each cohort for a total of 8 mice,  $p=0.2$ ).

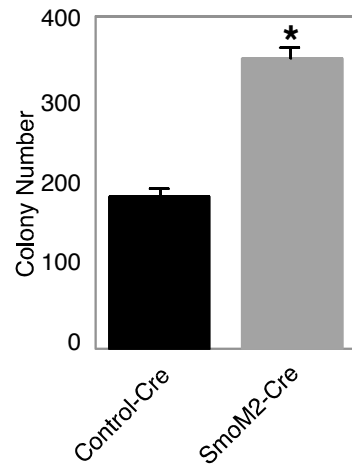

**Supplementary Figure 5: Post-embryonic activation of SmoM2 enhances BCR-ABL induced growth.** Bone marrow KLSF cells were harvested from wild type and SmoM2 mice, infected with MSCV-Cre (GFP) and MSCV-BCR-ABL (YFP) viruses. Sorted YFP<sup>+</sup>GFP<sup>+</sup> cells were plated (600 cells/well) in methylcellulose media (M3434), and colonies counted after 7-10 days (p=0.004). This indicates that the effect of Smo on CML growth is not limited to activation due to embryonic development.

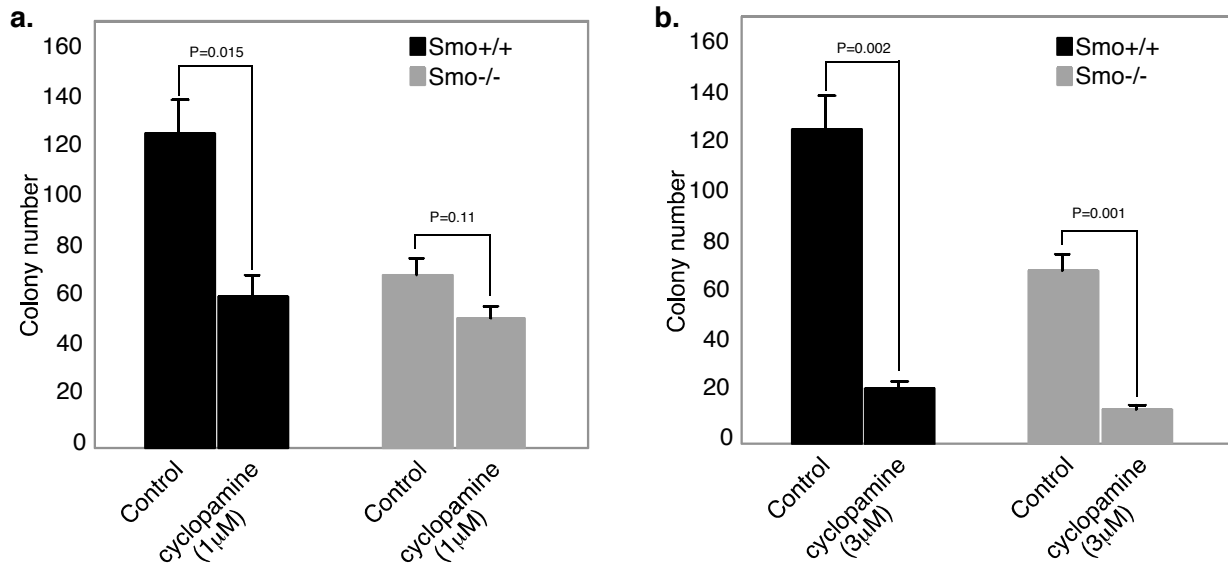

**Supplementary Figure 6: Specificity of cyclopamine dose *in vitro*.**

(a-b) Bone marrow KLSF cells from Smo<sup>+/+</sup> and Smo<sup>-/-</sup> mice were infected with BCR-ABL and plated (350 cells/well) in methylcellulose media (M3434) in the presence of (a) control and cyclopamine (1  $\mu$ M) or (b) control and cyclopamine (3  $\mu$ M). Colonies were counted after 7-10 days. 1  $\mu$ M cyclopamine (concentration used in experiments) did not add any further effect to the loss of Smoothed, suggesting minimal off target effects. However, 3  $\mu$ M cyclopamine impaired the growth of Smo<sup>-/-</sup> cells possibly indicating off target effects.

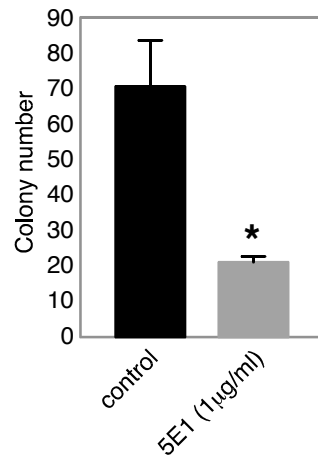

**Supplementary Figure 7: Inhibition of Hh ligand impairs CML growth.** KLS GFP<sup>+</sup> cells from CML mice were sorted and plated (500cells/well) in methylcellulose media (M3434) in the presence of control or 5E1 antibody (1µg/ml). Colonies were counted after 7-10 days. Data shown is representative of 2 independent experiments (p=0.01).

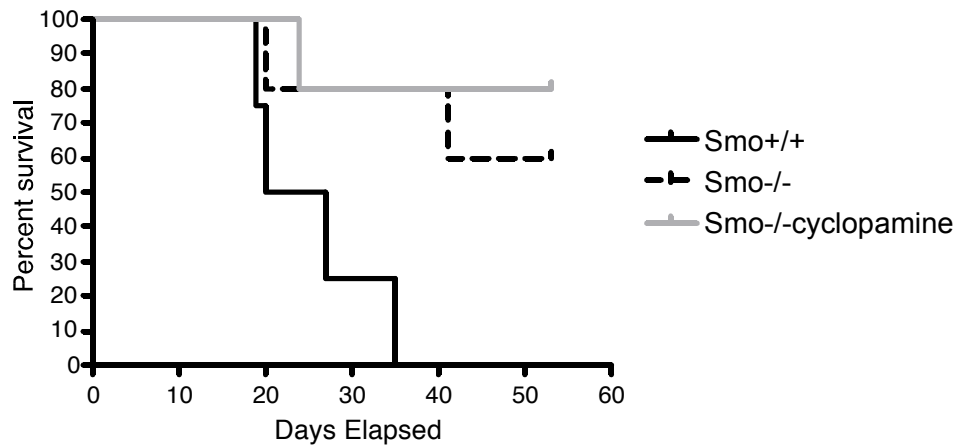

**Supplementary Figure 8: Specificity of cyclopamine dose *in vivo*.** 15,000 BCR-ABL infected Smo+/+ or Smo-/- KLSF cells were transplanted into lethally irradiated recipients along with 200,000 competing bone marrow cells. Subsequently, mice were treated with vehicle or cyclopamine as indicated and survival monitored. Smo+/+ vehicle data is same as in Supplementary Figure 11 (4 mice in each group for a total of 12 mice). Dose of cyclopamine used did not display additional impact beyond Smo loss, suggesting minimal off target effects.



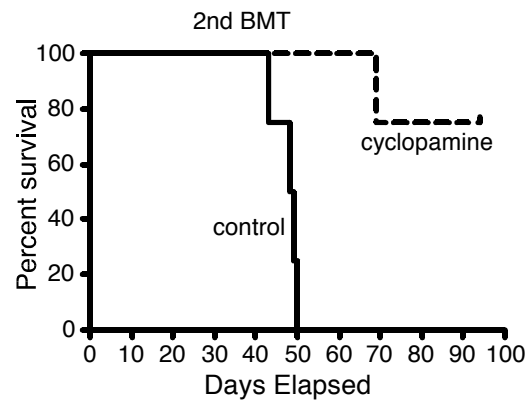

**Supplementary Figure 9: Cyclopamine treated CML display reduced self renewal and propagation in secondary hosts.** BCR-ABL infected cells were transplanted into recipient mice and treated with vehicle or cyclopamine. Following CML formation,  $2.5 \times 10^6$  CML cells from either pooled vehicle treated mice (5 CML samples) or cyclopamine treated mice (3 CML samples) were transplanted into secondary recipients and survival monitored ( $p=0.007$ ). Analysis is shown of 4 recipients per group for a total of 8 mice.

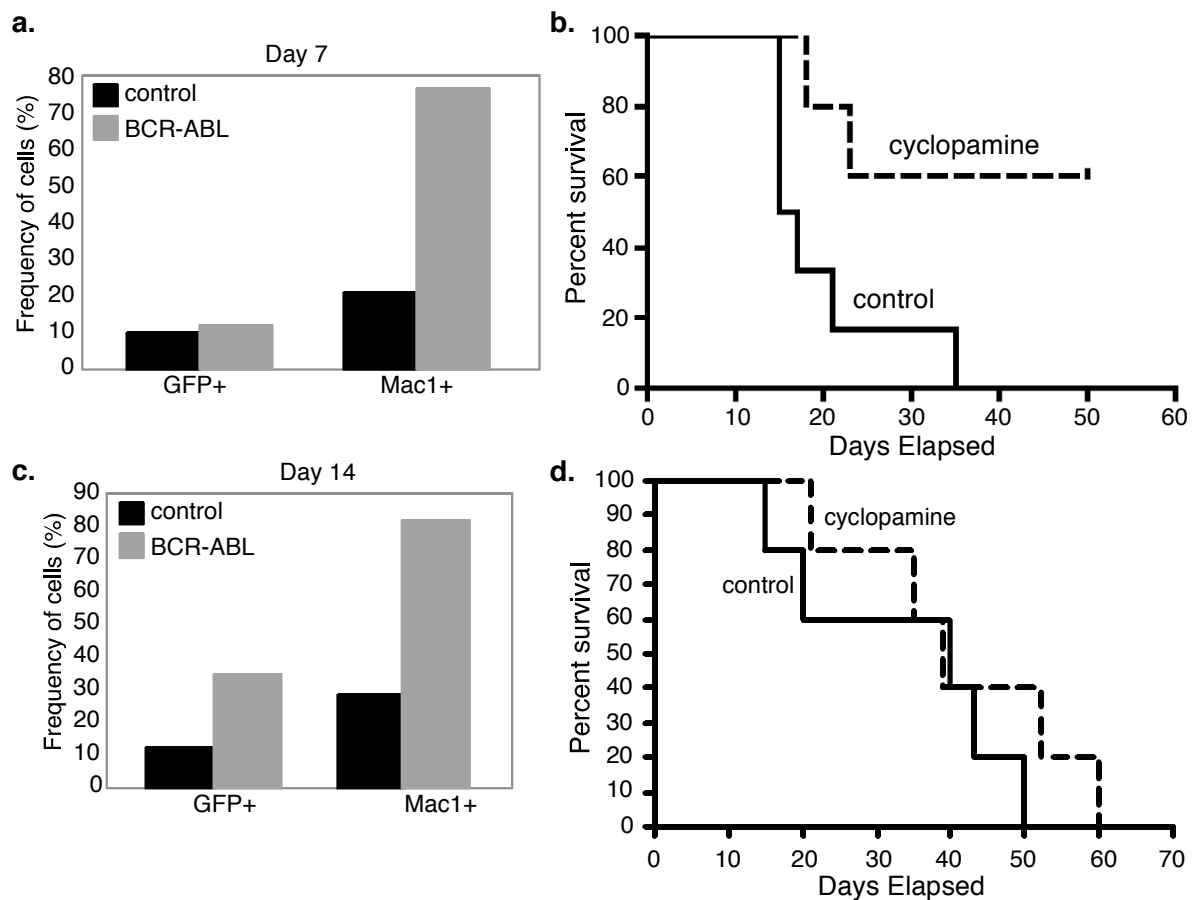

**Supplementary Figure 10: Efficacy of Hh blockade at different time points after CML development.** Bone marrow KLSF cells were infected with either control vector or BCR-ABL and transplanted into recipient mice. (a,c) Peripheral blood cells from the recipient mice were analyzed at (a) 7 days and (c) 14 days for BCR-ABL-GFP<sup>+</sup> total cell chimerism and GFP<sup>+</sup>myeloid (Mac1<sup>+</sup>) cell chimerism. (b,d) Survival curves of control or cyclopamine treated BCR-ABL mice after initiation of cyclopamine delivery at (b) 7 days (same as Figure 5, p value=.02) or (d) 14 days after transplant. Data shows analysis of 5 mice in each group for a total of 10 mice for d 14, and 30 mice for d7 over different experiments.

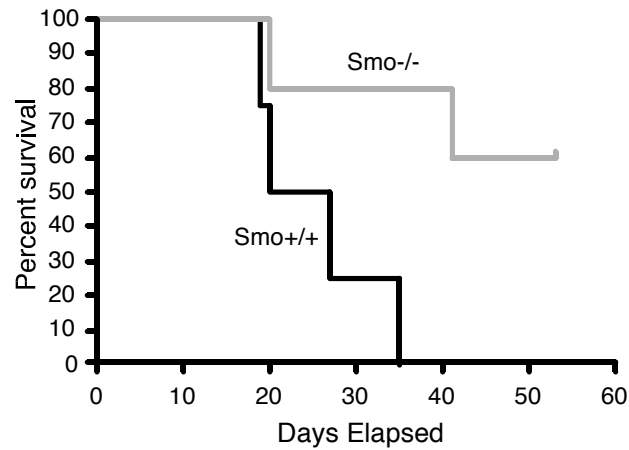

**Supplementary Figure 11: Impaired growth of Imatinib resistant CML in Smo-/- cells.** 15,000 BCR-ABL T3151 infected Smo+/+ or Smo-/- KLSF cells were transplanted into lethally irradiated recipients along with 200,000 competing bone marrow cells, and survival monitored (Data shows analysis of 4 mice in each group for a total of 8 mice  $p=0.025$ ).

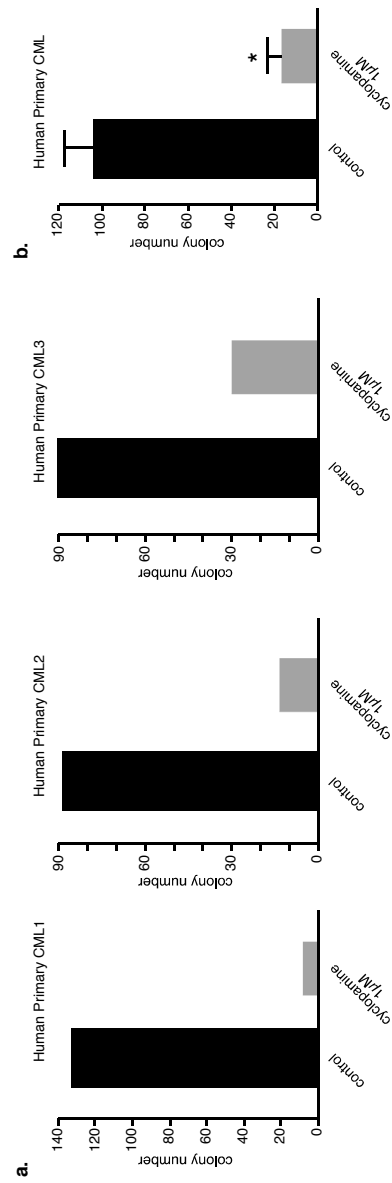

**Supplementary Figure 12: Pharmacologic inhibition of Smoothed impairs growth of human CML cells.** (a) CD34+ cells were sorted from primary uncultured human blast crisis CML samples and plated in methylcellulose in the presence of tomatidine (1mM) or cyclophosphamide (1mM). Colonies were counted after 12-14 days. Data shown is for three independent bcCML patient samples. (b) Graph of the average number of colonies for the three individual patient samples (also shown in figure 4i).

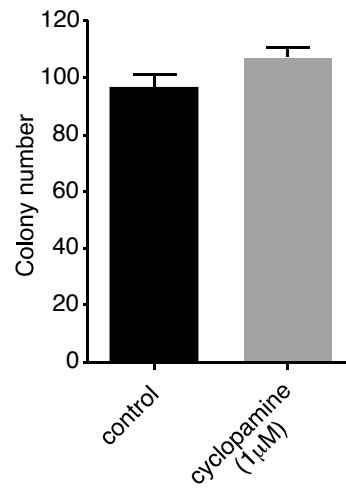

**Supplementary Figure 13: Impact of cyclopamine on human cord blood cells.**

hCD34<sup>+</sup> cells were sorted from primary human cord blood, plated ( $1 \times 10^5$ /well) in methylcellulose in the presence of either tomatidine 1mM (control) or cyclopamine 1mM. Colonies were counted after 12-14 days. The graph shows results from 2 independent cord blood samples, each plated in triplicate ( $p < 0.05$ )
